# Supplementary material for: Infections Requiring Hospitalization as Predictors of Pediatric-Onset Crohn's Disease and Ulcerative Colitis
Source: Gastroenterol Res Pract. 2015 May 14;2015:690581. doi: 10.1155/2015/690581 (PMC4446489; doi:10.1155/2015/690581)
Supplement: Supplementary file 1 — Supplementary Files include the infection-disease associations considering infections in any diagnosis position (Table 1), the observed infections and medications taken during hospitalizations for the cases hospitalized for infections for Crohn's disease (Table 2), ulcerative colitis (Table 3) and indeterminate colitis (Table 4). [file 690581.f1.pdf]

**Title: Infections Requiring Hospitalization as Predictors of Pediatric-Onset Crohn's Disease and Ulcerative Colitis**

Authors: Susan Hutfless,<sup>1</sup> Oren Abramson,<sup>2</sup> Melvin B. Heyman,<sup>3</sup> Theodore M. Bayless,<sup>1</sup> De-Kun Li,<sup>4</sup> Kevin Winthrop,<sup>5</sup> Lisa J. Herrinton<sup>4</sup>

**Table 1. Demographics of cases and age and membership matched controls**

|                               | Crohn's Disease | Ulcerative Colitis | Indeterminate<br>Colitis | All IBD | Controls* |
|-------------------------------|-----------------|--------------------|--------------------------|---------|-----------|
| <b>Number</b>                 | 216             | 248                | 37                       | 501     | 9,442     |
| <b>Gender, %</b>              |                 |                    |                          |         |           |
| Female                        | 44.4            | 48.8               | 37.8                     | 46.1    | 49.1      |
| <b>Race, %</b>                |                 |                    |                          |         |           |
| Non-Hispanic White            | 65.7            | 63.3               | 43.2                     | 62.9    | 47.5      |
| Non-Hispanic African-American | 10.7            | 5.2                | 10.8                     | 8.0     | 7.3       |
| Hispanic                      | 7.9             | 16.5               | 13.5                     | 12.6    | 14.8      |
| Asian/Pacific Islander        | 2.8             | 15.7               | 13.5                     | 5.0     | 11.6      |
| Native American               | 0.5             | 0.4                | 0                        | 0.4     | 0.4       |
| Multiracial                   | 7.4             | 4.4                | 10.8                     | 6.2     | 3.0       |
| Unknown                       | 5.1             | 4.4                | 8.1                      | 5.0     | 15.3      |
| <b>Age at index date, %</b>   |                 |                    |                          |         |           |
| 0-4                           | 3.7             | 4.8                | 10.8                     | 4.8     | 4.9       |
| 5-9                           | 12.0            | 10.1               | 18.9                     | 11.6    | 11.8      |
| 10-14                         | 42.6            | 41.9               | 37.8                     | 41.9    | 41.1      |
| 15-17                         | 41.7            | 43.2               | 32.4                     | 41.7    | 42.3      |

IBD, inflammatory bowel disease

\*Controls were matched to cases on age, sex and length of enrollment.

The index date was defined as the date of the case's IBD diagnosis for both cases and matched controls.

**Table 2. Adjusted odds ratio and 95% confidence intervals for the association of hospitalized infections with risk of Crohn's disease and ulcerative colitis, by timing and type of infection.**

| Timing of infection       | Type of infection* | Controls, % | Cases, % | Adjusted OR**<br>95% CI | Antibiotics adjusted<br>OR***<br>95% CI |
|---------------------------|--------------------|-------------|----------|-------------------------|-----------------------------------------|
| <b>CROHN'S DISEASE</b>    |                    |             |          |                         |                                         |
| Recent                    | All                | 0.2         | 1.4      | 6.3 (1.6 – 23.9)        | NE†                                     |
|                           | Non-intestinal     | 0.2         | 0.9      | 5.6 (1.1 – 28.2)        | 7.2 (0.7 – 69.8)                        |
|                           | Intestinal         | 0.1         | 0.9      | 19.4 (2.6 – 143.2)      | 19.4 (2.6 – 143.2)                      |
|                           | Respiratory        | 0.1         | 0        | NE                      | NE                                      |
| Distant                   | All                | 6.1         | 6.9      | 1.1 (0.6 – 1.9)         | 1.0 (0.6 – 1.8)                         |
|                           | Non-intestinal     | 6.0         | 6.5      | 1.0 (0.6 – 1.8)         | 0.9 (0.5 – 1.7)                         |
|                           | Intestinal         | 0.2         | 0.9      | 4.0 (0.8 – 20.0)        | 4.7 (0.9 – 24.1)                        |
|                           | Respiratory        | 2.6         | 1.9      | 0.7 (0.3 – 1.9)         | 0.7 (0.2 – 2.1)                         |
| <b>ULCERATIVE COLITIS</b> |                    |             |          |                         |                                         |
| Recent                    | All                | 0.2         | 0.4      | 2.0 (0.2 – 16.2)        | NE†                                     |
|                           | Non-intestinal     | 0.2         | 0.4      | 2.0 (0.2 – 16.2)        | NE†                                     |
|                           | Intestinal         | 0.02        | 0        | NE                      | NE                                      |
|                           | Respiratory        | 0.02        | 0        | NE                      | NE                                      |
| Distant                   | All                | 6.1         | 2.4      | 0.3 (0.2 – 0.8)         | 0.4 (0.2 – 0.9)                         |
|                           | Non-intestinal     | 5.7         | 2.4      | 0.3 (0.2 – 0.8)         | 0.4 (0.2 – 1.0)                         |
|                           | Intestinal         | 0.4         | 0        | NE                      | NE                                      |
|                           | Respiratory        | 2.4         | 1.2      | 0.5 (0.1 – 1.5)         | 0.6 (0.2 – 1.9)                         |

OR, Odds Ratio; NE, Not estimable

Recent = During the year before the index date

Distant = After birth to one year before the index date

\*Hospitalized infections were hospitalizations with diagnosis codes for infection in the principal diagnosis code position. Intestinal infections included ICD-9-CM codes 001-009 and 567. Children could contribute to the intestinal and non-intestinal infections analyses if they were hospitalized more than once. Respiratory infections included ICD-9-CM codes 460-466, 480-488, 770.0, and 770.18.

\*\*Compared with controls using conditional logistic regression accounting for the matching factors age and duration of membership as well as sex and race.

\*\*\*Compared with controls using conditional logistic regression accounting for the matching factors age and duration of membership as well as sex, race and the use of medication in the following therapeutic classes during the hospitalization or at discharge: aminoglycosides, cephalosporins, erythromycins/related macrolides, miscellaneous antimicrobials, penicillins, quinolones, sulfonamides, or tetracyclines.

† NE, Not estimable because all hospitalized cases received a medication

**Supplemental Table 1. Adjusted odds ratio and 95% confidence intervals for the association of hospitalized infections, indicated in any diagnostic position, with risk of Crohn's disease and ulcerative colitis, by age, timing and type of infection.**

| Timing of infection       | Type of infection* | Controls, % | Cases, % | Adjusted OR**<br>95% CI | Antibiotics adjusted OR***<br>95% CI |
|---------------------------|--------------------|-------------|----------|-------------------------|--------------------------------------|
| <b>CROHN'S DISEASE</b>    |                    |             |          |                         |                                      |
| <b>Age 0 – 5</b>          |                    |             |          |                         |                                      |
| Recent                    | All                | 0.6         | 5.9      | 9.3 (1.7 – 51.6)        | 9.7 (0.9 – 109.0)                    |
|                           | Non-intestinal     | 0.5         | 5.9      | 13.5 (2.2 – 82.4)       | 22.6 (3.1 – 165.4)                   |
|                           | Intestinal         | 0.2         | 2.9      | 20.8 (1.2- 360.6)       | NE                                   |
|                           | Respiratory        | 0.2         | 0        | NE                      | NE                                   |
| Distant                   | All                | 9.4         | 5.9      | 0.6 (0.1 – 2.7)         | 0.8 (0.2 – 3.6)                      |
|                           | Non-intestinal     | 9.4         | 5.9      | 0.6 (0.1 – 2.7)         | 0.8 (0.2 – 3.6)                      |
|                           | Intestinal         | 0           | 0        | NE                      | NE                                   |
|                           | Respiratory        | 4.5         | 2.9      | 0.7 (0.1 – 5.5)         | 1.1 (0.1 – 8.9)                      |
| <b>Age 10 – 17</b>        |                    |             |          |                         |                                      |
| Recent                    | All                | 0.3         | 2.2      | 8.0 (2.4 – 26.7)        | 5.2 (0.5 – 50.5)                     |
|                           | Non-intestinal     | 0.2         | 1.7      | 6.7 (1.7 – 26.2)        | 5.2 (0.5 – 50.7)                     |
|                           | Intestinal         | 0.03        | 0.6      | 18.5 (1.1 – 306.8)      | NE                                   |
|                           | Respiratory        | 0.03        | 0        | NE                      | NE                                   |
| Distant                   | All                | 8.3         | 7.7      | 0.9 (0.5 – 1.5)         | 0.8 (0.4 – 1.5)                      |
|                           | Non-intestinal     | 8.2         | 7.1      | 0.8 (0.4 – 1.4)         | 0.7 (0.4 – 1.4)                      |
|                           | Intestinal         | 0.2         | 1.1      | 4.0 (0.8 – 20.1)        | 4.7 (0.9 – 24.1)                     |
|                           | Respiratory        | 3.4         | 2.2      | 0.6 (0.2 – 1.7)         | 0.6 (0.2 – 1.8)                      |
| <b>ULCERATIVE COLITIS</b> |                    |             |          |                         |                                      |
| <b>Age 0 – 5</b>          |                    |             |          |                         |                                      |
| Recent                    | All                | 0.7         | 0        | NE                      | NE                                   |
|                           | Non-intestinal     | 0.6         | 0        | NE                      | NE                                   |
|                           | Intestinal         | 0.1         | 0        | NE                      | NE                                   |
|                           | Respiratory        | 0.3         | 0        | NE                      | NE                                   |
| Distant                   | All                | 9.1         | 8.1      | 0.9 (0.3 – 2.9)         | 0.7 (0.2 – 3.2)                      |
|                           | Non-intestinal     | 8.8         | 8.1      | 0.9 (0.3 – 2.9)         | 0.7 (0.2 – 3.3)                      |
|                           | Intestinal         | 0.4         | 0        | NE                      | NE                                   |
|                           | Respiratory        | 4.4         | 5.4      | 1.2 (0.3 – 5.3)         | 1.7 (0.4 – 7.5)                      |

Formatted Table

| Timing of infection | Type of infection* | Controls, % | Cases, % | Adjusted OR**<br>95% CI | Antibiotics adjusted<br>OR***<br>95% CI |
|---------------------|--------------------|-------------|----------|-------------------------|-----------------------------------------|
| <b>Age 10 – 17</b>  |                    |             |          |                         |                                         |
| Recent              | All                | 0.3         | 1.0      | 3.1 (0.7 – 14.2)        | 3.9 (0.5 – 33.9)                        |
|                     | Non-intestinal     | 0.3         | 1.0      | 3.1 (0.7 – 14.2)        | 3.9 (0.5 – 33.9)                        |
|                     | Intestinal         | 0           | 0        | NE                      | NE                                      |
|                     | Respiratory        | 0.07        | 0.5      | 5.9 (0.6 – 58.7)        | NE                                      |
| Distant             | All                | 7.6         | 4.3      | 0.5 (0.2 – 1.0)         | 0.6 (0.3 – 1.2)                         |
|                     | Non-intestinal     | 7.3         | 4.3      | 0.5 (0.3 – 1.0)         | 0.6 (0.3 – 1.2)                         |
|                     | Intestinal         | 0.4         | 0        | NE                      | NE                                      |
|                     | Respiratory        | 2.9         | 1.4      | 0.4 (0.1 – 1.5)         | 0.6 (0.2 – 1.9)                         |

OR, Odds Ratio; NE, Not estimable

Recent = During the year before the index date

Distant = After birth to one year before the index date

\*Hospitalized infections were hospitalizations with diagnosis codes for infection in the principal diagnosis code position. Intestinal infections included ICD-9-CM codes 001-009 and 567. Children could contribute to the intestinal and non-intestinal infections analyses if they were hospitalized more than once.

\*\*Compared with controls using conditional logistic regression accounting for the matching factors age and duration of membership as well as sex and race.

\*\*\*Compared with controls using conditional logistic regression accounting for the matching factors age and duration of membership as well as sex, race and the use of medication in the following therapeutic classes during the hospitalization or at discharge: aminoglycosides, cephalosporins, erythromycins/related macrolides, miscellaneous antimicrobials, penicillins, quinolones, sulfonamides, or tetracyclines.

† NE, Not estimable because all hospitalized controls received a medication (75% of cases)

†† NE, Not estimable because no hospitalized cases received a medication

Formatted Table

**Supplement Table 2. Hospitalized infections observed in Crohn's disease cases prior to diagnosis**

| Case                          | Race           | IBD type | Time between first symptoms and diagnosis (years) | Age of diagnosis | Age infection (years) | Time between infection and dx | Principal diagnosis                                                  | Type of infection                                                     | Medications during hospitalization*   | Specific pathogen laboratory results?*                                                                   | Length of stay (days) |
|-------------------------------|----------------|----------|---------------------------------------------------|------------------|-----------------------|-------------------------------|----------------------------------------------------------------------|-----------------------------------------------------------------------|---------------------------------------|----------------------------------------------------------------------------------------------------------|-----------------------|
| Female #1                     | White          | CD       | 3.5                                               | 4                | 6 months              | 3.3 years                     | Other unspecified non-infectious gastroenteritis and colitis         | Acute upper respiratory infection, unspecified site                   | None                                  | None                                                                                                     | <1                    |
| Female #2                     | White          | CD       | 0.9                                               | 5                | 5                     | 11 days                       | Abdominal pain                                                       | Intestinal infections due to other organisms                          | Metronidazole, Ampicillin, Gentamicin | None                                                                                                     | 4                     |
| Female #3                     | White          | CD       | 0.2                                               | 8                | 1                     | 6.5 years                     | Otitis media                                                         | Otitis media                                                          | <1995                                 | <1995                                                                                                    | 13                    |
| Female #4                     | White          | CD       | 0.6                                               | 12               | 12                    | 18 days                       | Anal fistula                                                         | Cellulites or abscess on trunk                                        | None                                  | None                                                                                                     | <1                    |
| Female #5                     | White          | CD       | 0.0                                               | 13               | 9 months              | 12.1 years                    | Acute pyelonephritis                                                 | Streptococcus                                                         | <1995                                 | <1995                                                                                                    | 2                     |
| Female #6                     | White          | CD       | 0.1                                               | 14               | 14                    | 11 days                       | Blood in stool                                                       | Colitis, enteritis, and gastroenteritis of presumed infectious origin | Ceftriaxone, Quinolones (unspecified) | Clostridium Difficile toxin negative. No E coli O157:H7, Salmonella, Shigella, or Campylobacter isolated | 2                     |
| Female #7                     | Multiple races | CD       | 0.1                                               | 17               | 1                     | 16 years                      | Intestinal infection due to other organism, not elsewhere classified | Intestinal infection due to other organism, not elsewhere classified  | <1995                                 | <1995                                                                                                    | 3                     |
| Female #8                     | White          | CD       | 0                                                 | 17               | 1                     | 16 years                      | Otitis media                                                         | Otitis media                                                          | <1995                                 | <1995                                                                                                    | <1                    |
| Female #9, Hospitalization #1 | White          | CD       | 0                                                 | 17               | 1 month               | 17 years                      | Unspecified viral infection                                          | Unspecified viral meningitis                                          | <1995                                 | <1995                                                                                                    | 3                     |

| Case                          | Race        | IBD type | Time between first symptoms and diagnosis (years) | Age of diagnosis | Age infection (years) | Time between infection and dx | Principal diagnosis                                                         | Type of infection                                                                                                | Medications during hospitalization* | Specific pathogen laboratory results?* | Length of stay (days) |
|-------------------------------|-------------|----------|---------------------------------------------------|------------------|-----------------------|-------------------------------|-----------------------------------------------------------------------------|------------------------------------------------------------------------------------------------------------------|-------------------------------------|----------------------------------------|-----------------------|
| Female #9, Hospitalization #2 |             |          |                                                   |                  | 8                     | 9 years                       | Cellulitis or abscess on face                                               | Cellulitis or abscess on face and Methicillin susceptible Staphylococcus aureus                                  | Cephalosporins (unspecified)        | None                                   | 1                     |
| Female #10                    | White       | CD       | 0.4                                               | 17               | 2                     | 16 years                      | Otitis media                                                                | Otitis media                                                                                                     | <1995                               | <1995                                  | <1                    |
| Male #1, Hospitalization #1   | Multiracial | CD       | 0.3                                               | 3                | 3                     | 4 months                      | Unspecified viral infection                                                 | Unspecified viral infection                                                                                      | None                                | None                                   | 4                     |
| Male #1, Hospitalization #2   |             |          |                                                   |                  | 3                     | 7 days                        | Clostridium difficile                                                       | Clostridium difficile                                                                                            | Vancomycin                          | None                                   | 2                     |
| Male #2                       | White       | CD       | 0.3                                               | 10               | 3                     | 7 years                       | Otitis media                                                                | Otitis media                                                                                                     | None                                | None                                   | <1                    |
| Male #3                       | White       | CD       | 0.2                                               | 11               | 9 months              | 10 years                      | Cellulitis or abscess of hand                                               | Cellulitis or abscess of hand and Methicillin susceptible Staphylococcus aureus and Candidiasis of skin or nails | Nafcillin                           | None                                   | 3                     |
| Male #4, Hospitalization #1   | White       | CD       | 0.1                                               | 11               | 1 month               | 11 years                      | Extreme immaturity                                                          | Other infection specific to the perinatal period and impetigo                                                    | <1995                               | <1995                                  | 103                   |
| Male #4, Hospitalization #2   |             |          |                                                   | 11               | 5 months              | 11 years                      | Infection or inflammatory reaction due to vascular device, implant or graft | Other specified septicemia                                                                                       | <1995                               | <1995                                  | 19                    |
| Male #4, Hospitalization #3   |             |          |                                                   | 11               | 6 months              | 11 years                      | Other suppurative peritonitis                                               | Other suppurative peritonitis and Candidiasis of mouth                                                           | <1995                               | <1995                                  | 39                    |

| Case                        | Race     | IBD type | Time between first symptoms and diagnosis (years) | Age of diagnosis | Age infection (years) | Time between infection and dx | Principal diagnosis                                        | Type of infection                                                               | Medications during hospitalization*            | Specific pathogen laboratory results?*                                        | Length of stay (days) |
|-----------------------------|----------|----------|---------------------------------------------------|------------------|-----------------------|-------------------------------|------------------------------------------------------------|---------------------------------------------------------------------------------|------------------------------------------------|-------------------------------------------------------------------------------|-----------------------|
| Male #4, Hospitalization #4 |          |          |                                                   | 11               | 6 months              | 11 years                      | Other or unspecified postsurgical intestinal malabsorption | Candidiasis of mouth and acute bronchiolitis and otitis media                   | <1995                                          | <1995                                                                         | 41                    |
| Male #4, Hospitalization #5 |          |          |                                                   | 11               | 1                     | 10 years                      | Other or unspecified postsurgical intestinal malabsorption | Candidiasis of skin and nails                                                   | <1995                                          | <1995                                                                         | 38                    |
| Male #4, Hospitalization #6 |          |          |                                                   | 11               | 1                     | 10 years                      | Colostomy and enterostomy complication                     | Other specified bacterial infection                                             | <1995                                          | <1995                                                                         | 6                     |
| Male #4, Hospitalization #7 |          |          |                                                   | 11               | 1                     | 10 years                      | Other or unspecified postsurgical intestinal malabsorption | Acute upper respiratory infection and unspecified viral or chlamydial infection | <1995                                          | <1995                                                                         | 122                   |
| Male #4, Hospitalization #8 |          |          |                                                   | 11               | 9                     | 2.5 years                     | Pneumonia                                                  | Pneumonia                                                                       | Erythromycins/related macrolides (unspecified) | None                                                                          | 2                     |
| Male #4, Hospitalization #9 |          |          |                                                   | 11               | 11                    | 4 months                      | Unspecified viral infection                                | Unspecified viral infection                                                     | Metronidazole, Ampicillin, Gentamicin          | C difficile toxin negative; No salmonella, shigella or campylobacter isolated | 2                     |
| Male #5                     | White    | CD       | 0.1                                               | 12               | 1                     | 10 years                      | Otitis media                                               | Otitis media                                                                    | <1995                                          | <1995                                                                         | <1                    |
| Male #6                     | White    | CD       | 0                                                 | 13               | 6                     | 7 years                       | Otitis media                                               | Otitis media                                                                    | None                                           | None                                                                          | <1                    |
| Male #7                     | White    | CD       | 2.2                                               | 13               | 2 months              | 13 years                      | Otitis media                                               | Otitis media                                                                    | <1995                                          | <1995                                                                         | 2                     |
| Male #8, Hospitalization #1 | Hispanic | CD       | 0.2                                               | 15               | 6                     | 9 years                       | Pneumonia                                                  | Pneumonia                                                                       | <1995                                          | <1995                                                                         | 1                     |

| Case                        | Race  | IBD type | Time between first symptoms and diagnosis (years) | Age of diagnosis | Age infection (years) | Time between infection and dx | Principal diagnosis                             | Type of infection                                                                   | Medications during hospitalization*                 | Specific pathogen laboratory results?* | Length of stay (days) |
|-----------------------------|-------|----------|---------------------------------------------------|------------------|-----------------------|-------------------------------|-------------------------------------------------|-------------------------------------------------------------------------------------|-----------------------------------------------------|----------------------------------------|-----------------------|
| Male #8, Hospitalization #2 |       |          |                                                   |                  | 9                     | 6 years                       | Pneumonia                                       | Pneumonia                                                                           | <1995                                               | <1995                                  | 3                     |
| Male #9                     | White | CD       | 0                                                 | 15               | 6                     | 9 years                       | Acute tracheitis without mention of obstruction | Acute tracheitis without mention of obstruction and pneumonia due to Staphylococcus | <1995                                               | <1995                                  | 7                     |
| Male #10                    | White | CD       | 0                                                 | 15               | 4 months              | 15 years                      | Acute bronchitis                                | Candidiasis of mouth                                                                | <1995                                               | <1995                                  | 2                     |
| Male #11                    | White | CD       | 0.2                                               | 17               | 17                    | 2 months                      | Suppurative peritonitis                         | Suppurative peritonitis                                                             | Metronidazole, Ciprofloxacin, Cefotetan, Gentamicin | None                                   | 8                     |

\*Pharmacy and laboratory reports available 1995 and later. <1995 indicates that hospitalization occurred prior to 1995 when information was not available.

**Supplement Table 3. Hospitalized infections observed in ulcerative colitis cases prior to diagnosis**

| Case # (to identify multiple infections in same kid) | Race  | IBD type | Time between symptoms and diagnosis (years) | Age of diagnosis (years) | Age infection (years) | Time between infection and dx (years) | Principal diagnosis                               | Type of infection                         | Medications during hospitalization* | Specific pathogen laboratory results?*                                                                                                                                                                                                           | Length of stay (days) |
|------------------------------------------------------|-------|----------|---------------------------------------------|--------------------------|-----------------------|---------------------------------------|---------------------------------------------------|-------------------------------------------|-------------------------------------|--------------------------------------------------------------------------------------------------------------------------------------------------------------------------------------------------------------------------------------------------|-----------------------|
| Female #1                                            | White | UC       | 0                                           | 5                        | 0                     | 5                                     | Birth                                             | Congenital pneumonia                      | None                                | None                                                                                                                                                                                                                                             | <1                    |
| Female #2                                            | White | UC       | 0.1                                         | 5                        | 1.1                   | 4.0                                   | Croup                                             | Croup                                     | None                                | None                                                                                                                                                                                                                                             | <1                    |
| Female #3, Hospitalization #1                        | White | UC       | 0                                           | 10                       | 4.1                   | 6.3                                   | Unspecified viral infection                       | Unspecified viral infection               | <1995                               | <1995                                                                                                                                                                                                                                            | 2                     |
| Female #3, Hospitalization #2                        |       |          |                                             |                          | 6.3                   | 4.0                                   | Acute polyarticular juvenile rheumatoid arthritis | Acute lymphadenitis                       | None                                | No salmonella, shigella or campylobacter isolated; No yersinia enterocolitica isolated; Negative for clostridium difficile toxin; Infectious Mononucleosis Screen negative, EBV negative; Leptospira positive, CMV positive, Adenovirus positive | 10                    |
| Female #4                                            | White | UC       | 0.3                                         | 11                       | 0.9                   | 10                                    | Convulsions                                       | Unspecified viral or chlamydial infection | <1995                               | <1995                                                                                                                                                                                                                                            | 3                     |

| Case # (to identify multiple infections in same kid) | Race     | IBD type | Time between symptoms and diagnosis (years) | Age of diagnosis (years) | Age infection (years) | Time between infection and dx (years) | Principal diagnosis                             | Type of infection            | Medications during hospitalization* | Specific pathogen laboratory results?* | Length of stay (days) |
|------------------------------------------------------|----------|----------|---------------------------------------------|--------------------------|-----------------------|---------------------------------------|-------------------------------------------------|------------------------------|-------------------------------------|----------------------------------------|-----------------------|
| Female #5                                            | White    | UC       | 0                                           | 13                       | 6.3                   | 6.4                                   | Hypertrophy of tonsils with adenoids            | Otitis media                 | <1995                               | <1995                                  | 1                     |
| Female #6, Hospitalization #1                        | White    | UC       | 0                                           | 13                       | 1.7                   | 11.7                                  | Otitis media                                    | Otitis media                 | <1995                               | <1995                                  | <1                    |
| Female #6, Hospitalization #2                        |          |          |                                             |                          | 3.1                   | 10.3                                  | Hypertrophy of adenoids                         | Otitis media                 | <1995                               | <1995                                  | <1                    |
| Female #7                                            | White    | UC       | 0                                           | 15                       | 2.4                   | 12.7                                  | Acute febrile mucocutaneous lymph node syndrome | Streptococcal sore throat    | <1995                               | <1995                                  | 5                     |
| Female #8                                            | Hispanic | UC       | 0                                           | 16                       | 14.5                  | 1.2                                   | Pilonidal cyst with abscess                     | Pilonidal cyst with abscess  | None                                | None                                   | 1                     |
| Male #1                                              | White    | UC       | 0.2                                         | 6                        | 2.6                   | 3.6                                   | Extrinsic asthma with status asthmaticus        | Otitis media                 | Erythromycin                        | None                                   | 3                     |
| Male #2                                              | White    | UC       | 0.1                                         | 10                       | 9.6                   | 0.4                                   | Coats' syndrome                                 | Acute pharyngitis            | None                                | None                                   | 0                     |
| Male #3                                              | White    | UC       | 0                                           | 12                       | 11.2                  | 0.5                                   | Acute lymphadenitis                             | Acute lymphadenitis          | Ampicillin                          | Anaerobe culture negative              | 3                     |
| Male #4, Hospitalization #1                          | White    | UC       | 0.2                                         | 16                       | 1.6                   | 14.1                                  | Pneumonia                                       | Pneumonia and otitis media   | <1995                               | <1995                                  | 1                     |
| Male #4, Hospitalization #2                          |          |          |                                             |                          | 3.2                   | 12.5                                  | Chickenpox                                      | Chickenpox and scarlet fever | <1995                               | <1995                                  | 2                     |
| Male #5                                              | White    | UC       | 0.3                                         | 16                       | 4.7                   | 11.7                                  | Croup                                           | Croup                        | <1995                               | <1995                                  | 1                     |
| Male #6                                              | Hispanic | UC       | 0.1                                         | 17                       | 5.5                   | 11.4                                  | Extrinsic asthma with status asthmaticus        | Pneumonia                    | None                                | None                                   | 4                     |

\*Laboratory reports available 1995 and later. <1995 indicates that hospitalization occurred prior to 1995 when information was not available.

**Supplement Table 4. Hospitalized infections observed in indeterminate colitis cases prior to diagnosis**

| Case # (to identify multiple infections in same kid) | Race        | IBD type | Time between symptoms and diagnosis (years) | Age of diagnosis | Age infection | Time between infection and dx (years) | Principal diagnosis                                             | Type of infection                                                                                                      | Medications during hospitalization* | Specific pathogen laboratory results?*                                                              | Length of stay (days) |
|------------------------------------------------------|-------------|----------|---------------------------------------------|------------------|---------------|---------------------------------------|-----------------------------------------------------------------|------------------------------------------------------------------------------------------------------------------------|-------------------------------------|-----------------------------------------------------------------------------------------------------|-----------------------|
| Female #1                                            | Hispanic    | IC       | 0                                           | 8                | 8.0           | 0.3                                   | Acute tonsillitis                                               | Acute tonsillitis                                                                                                      | None                                | None                                                                                                | <1                    |
| Male #1                                              | Asian       | IC       | 0.2                                         | 7                | 0.4           | 6.9                                   | Acute respiratory syncytial virus                               | Acute respiratory syncytial virus and pneumonia                                                                        | Erythromycin, Cefaclor, Amoxicillin | No Bordetella isolated, bordetella direct fa negative; Positive for resp. syncytial virus direct fa | 3                     |
| Male #2                                              | Multiracial | IC       | 0.1                                         | 13.8             | 0.1           | 13.7                                  | Acute pyelonephritis without lesion of renal medullary necrosis | Acute pyelonephritis without lesion of renal medullary necrosis and Escherichia coli and Candidiasis of skin and nails | <1995                               | <1995                                                                                               | 4                     |
| Male #3                                              | Multiracial | IC       | 0                                           | 17               | 4.5           | 13.4                                  | Otitis media                                                    | Otitis media                                                                                                           | <1995                               | <1995                                                                                               | <1                    |

\*Laboratory reports available 1995 and later. <1995 indicates that hospitalization occurred prior to 1995 when information was not available.
